# Supplementary material for: Facile synthesis of unsaturated polyester-based double-network gels via chemoselective cross-linking using Michael addition and subsequent UV-initiated radical polymerization
Source: Royal Society of Chemistry journal article supplement (doi:10.1039/c4ra13020k), 2014-11-20
Supplement: c4ra13020k1.pdf [file c4ra13020k1.pdf]

# **Facile Synthesis of Unsaturated Polyester-Based Double-Network Gels via Chemoselective Cross-Linking using Michael Addition and Subsequent UV-Initiated Radical Polymerization**

*Tang Tang, Akinori Takasu*

Department of Frontier Materials, Graduate School of Engineering, Nagoya Institute of Technology, Gokiso-cho, Showa-ku, Nagoya 466-8555, Japan

Telephone: +81-52-735-7159; Fax: +81-52-735-5342; E-mail:

[takasu.akinori@nitech.ac.jp](mailto:takasu.akinori@nitech.ac.jp)

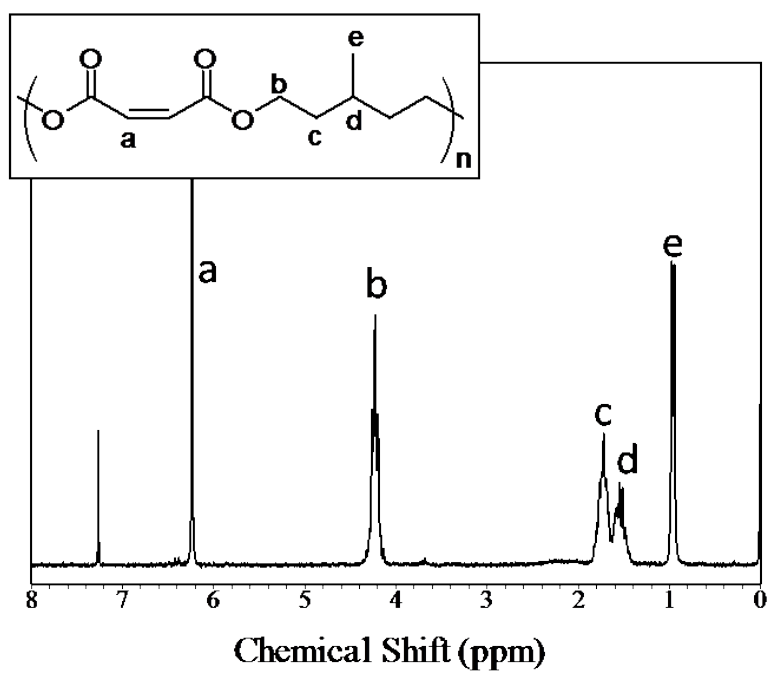

Figure S1.  $^1\text{H}$  NMR spectrum of poly(MAn-*alt*-MPD).

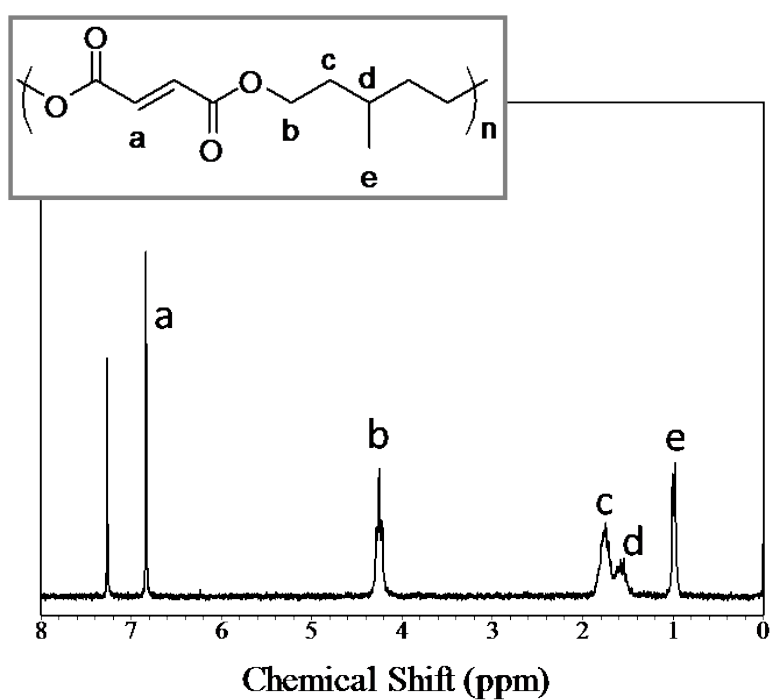

Figure S2.  $^1\text{H}$  NMR spectrum of poly(FA-*alt*-MPD) (after isomerization of poly(MAn-*alt*-MPD) in DMF for 12 h).

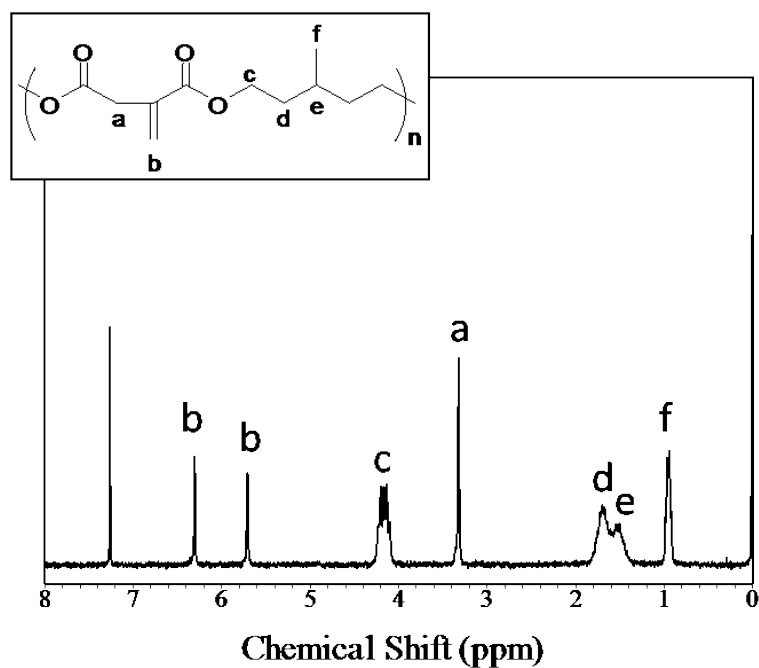

Figure S3. <sup>1</sup>H NMR spectrum of poly(IAn-*alt*-MPD).

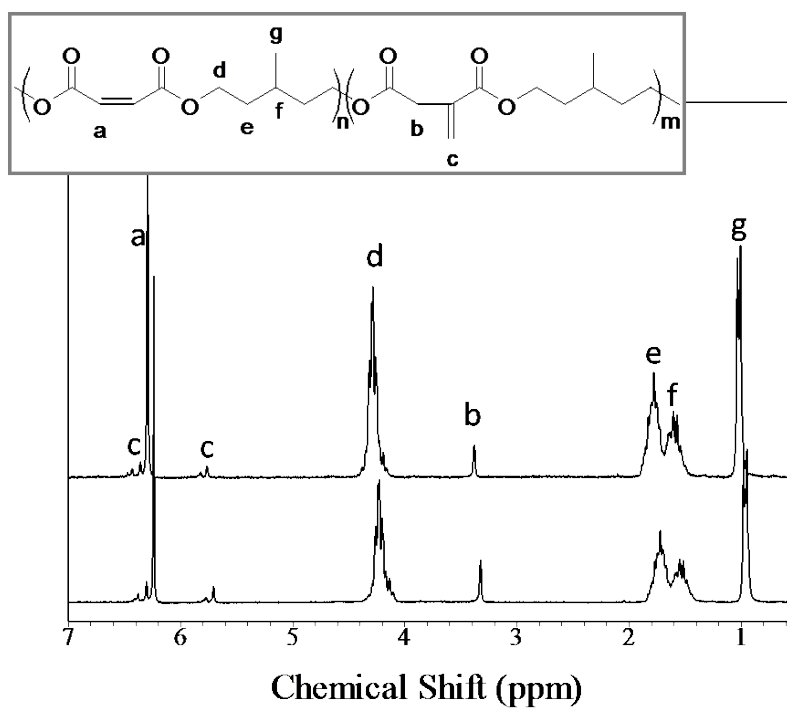

Figure S4. <sup>1</sup>H NMR spectra of poly(IAn-*co*-MAN-*co*-MPD)(upper, [IAn]<sub>0</sub>:[MAN]<sub>0</sub>=1:8; lower, [IAn]<sub>0</sub>:[MAN]<sub>0</sub>=1:4).

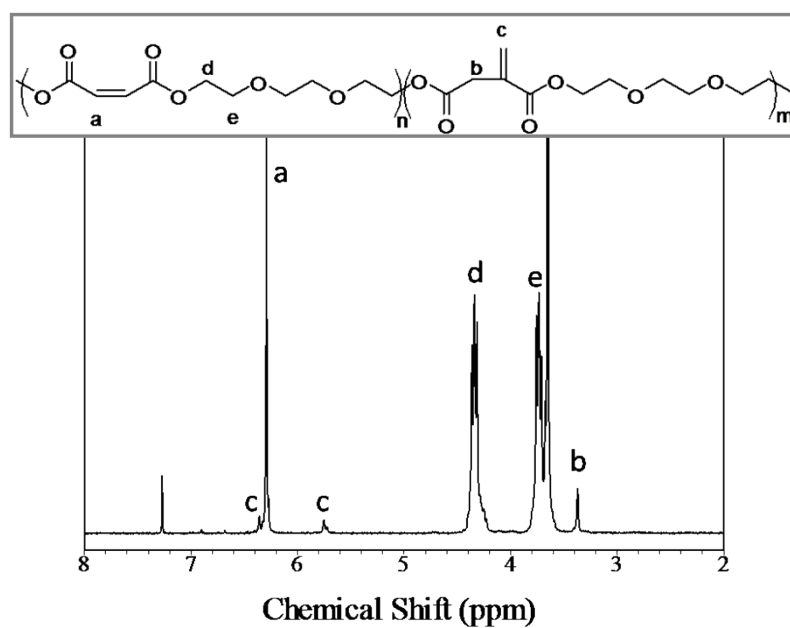

Figure S5.  $^1\text{H}$  NMR spectrum of poly(IAn-co-MAN-co-TEG).

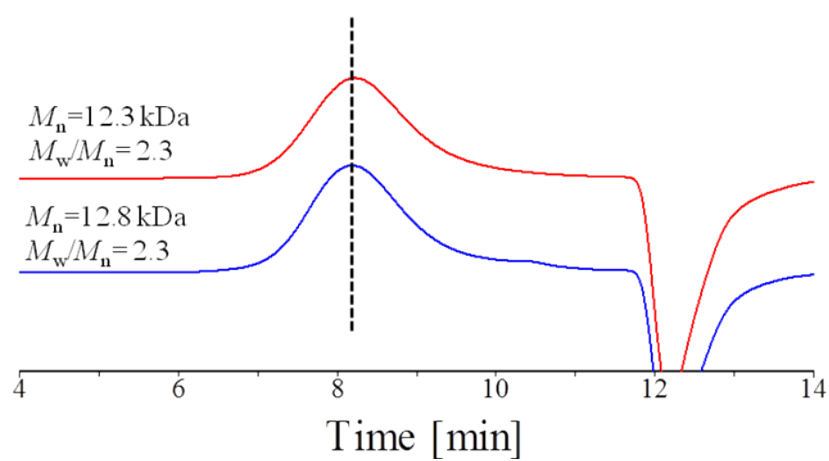

Figure S6. SEC curves of maleate polyester (blue line) and fumarate polyester after isomerization in DMF for 12 h (red line).

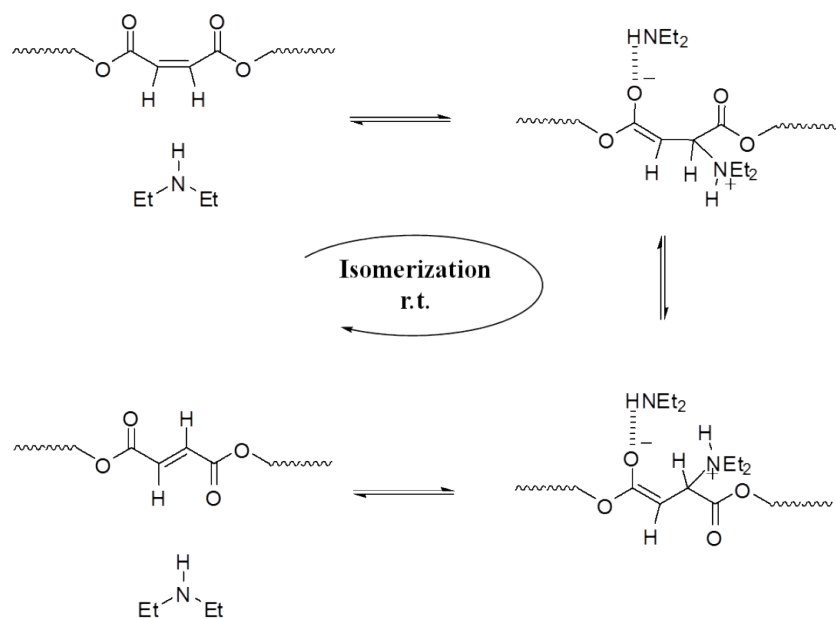

**Figure S7. Mechanism of isomerization of maleate double bonds to fumarate double bonds.**

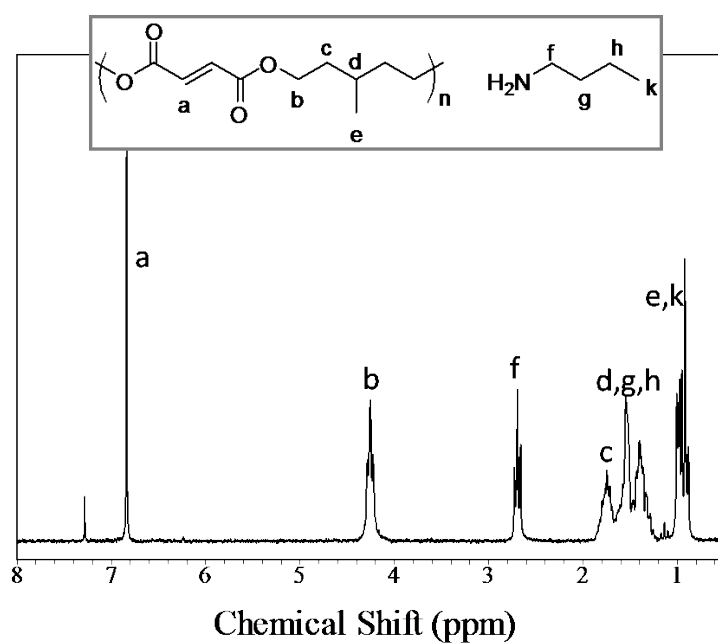

**Figure S8.  $^1\text{H}$  NMR spectrum of product from reaction of poly(FA-*alt*-MPD) and *n*-butylamine at room temperature for 20 min (Table 3, entry 1).**

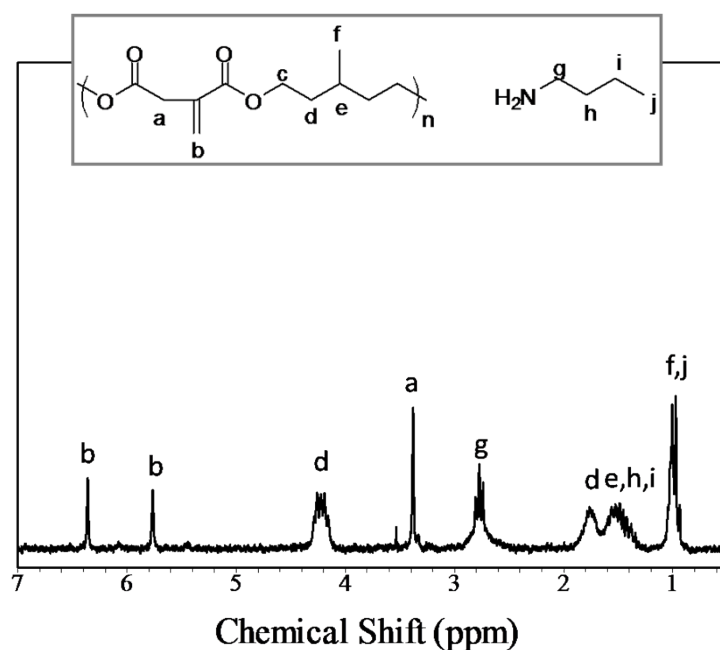

Figure S9.  $^1\text{H}$  NMR spectrum of product from reaction of poly(1An-*alt*-MPD) and *n*-butylamine at room temperature for 20 min (Table 3, entry 2).

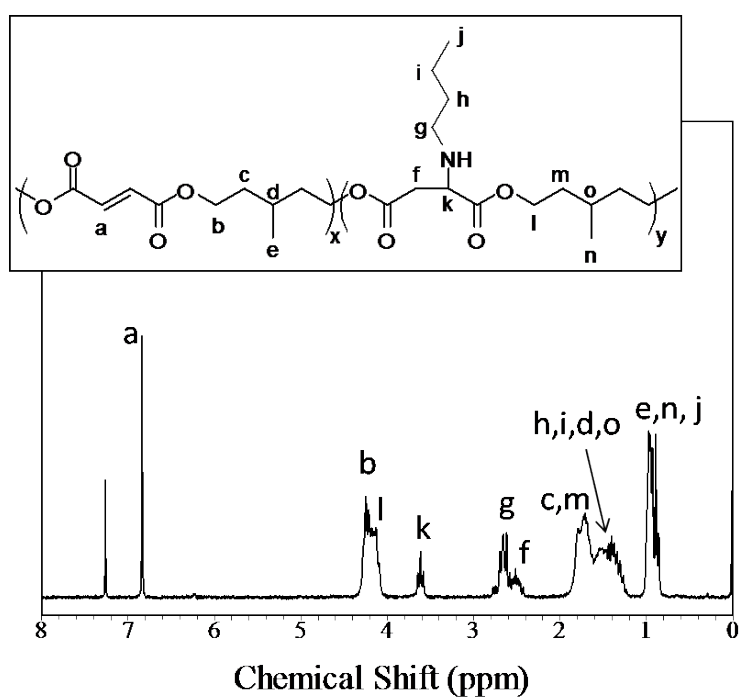

Figure S10.  $^1\text{H}$  NMR spectrum of poly(amino-ester) prepared by Michael addition of poly(MAN-*alt*-MPD) with *n*-butylamine at room temperature.

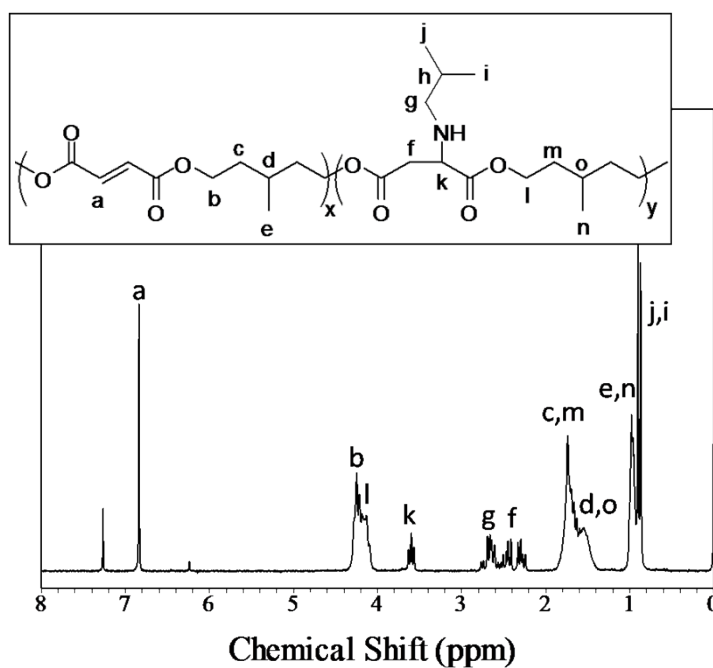

**Figure S11.**  $^1\text{H}$  NMR spectrum of poly(amino-ester) prepared by Michael addition of poly(MAn-*alt*-MPD) with isobutylamine at room temperature.

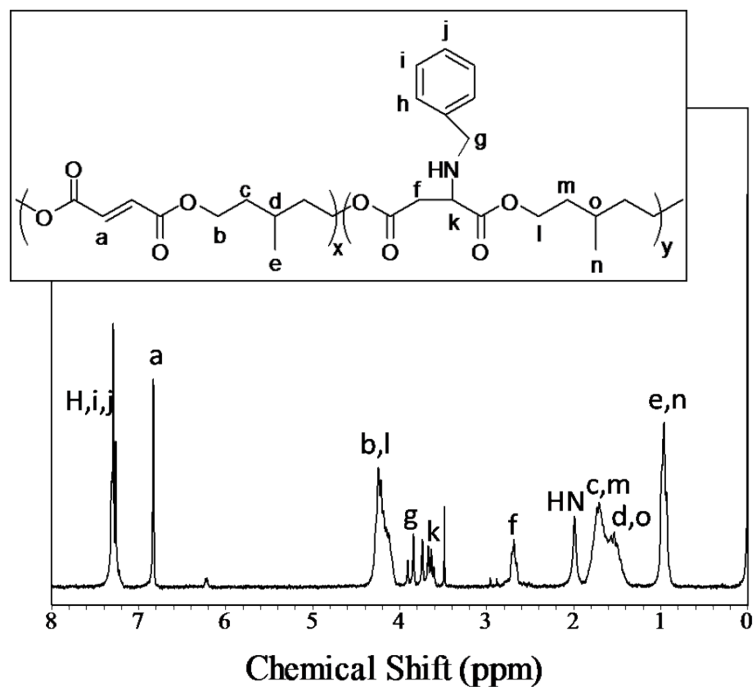

**Figure S12.**  $^1\text{H}$  NMR spectrum of poly(amino-ester) prepared by Michael addition of poly(MAn-*alt*-MPD) with benzylamine at room temperature.

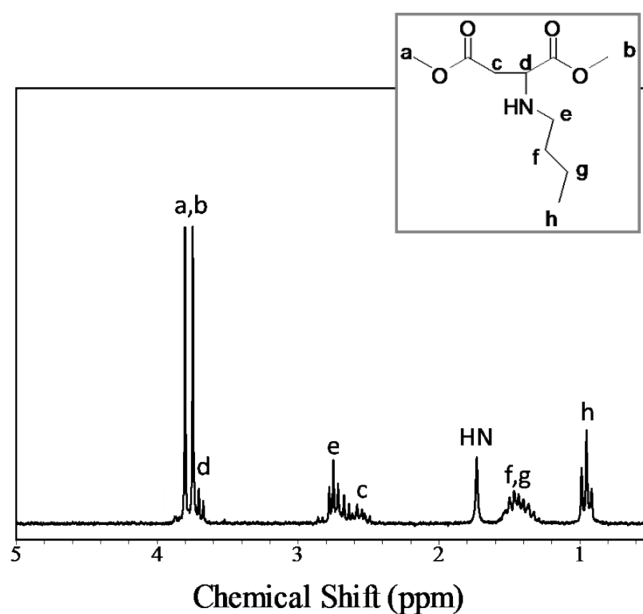

**Figure S13.**  $^1\text{H}$  NMR spectrum of dimethyl 2-(butylamino)butanedioate synthesized by Michael addition of dimethyl maleate with *n*-butylamine.

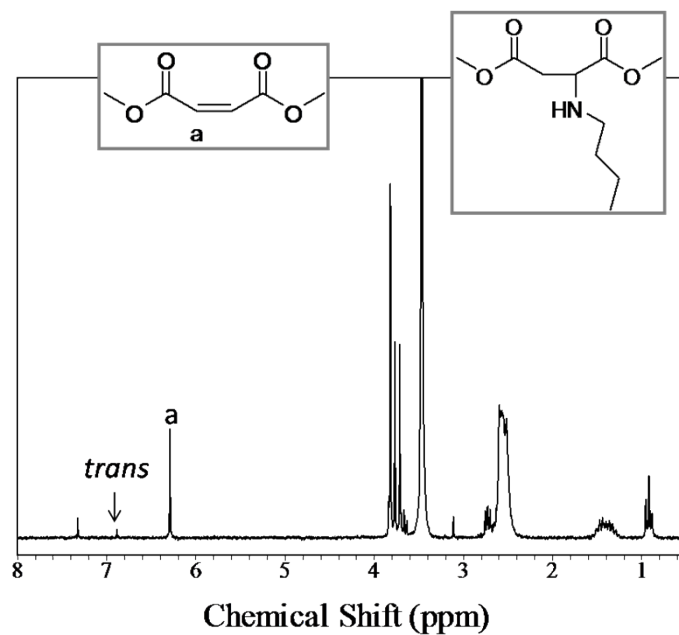

**Figure S14.**  $^1\text{H}$  NMR spectrum of model reaction. Dimethyl 2-(butylamino)butanedioate reacted with dimethyl maleate for 24 h, and only 4% of *cis* double bonds isomerized to *trans* double bonds.

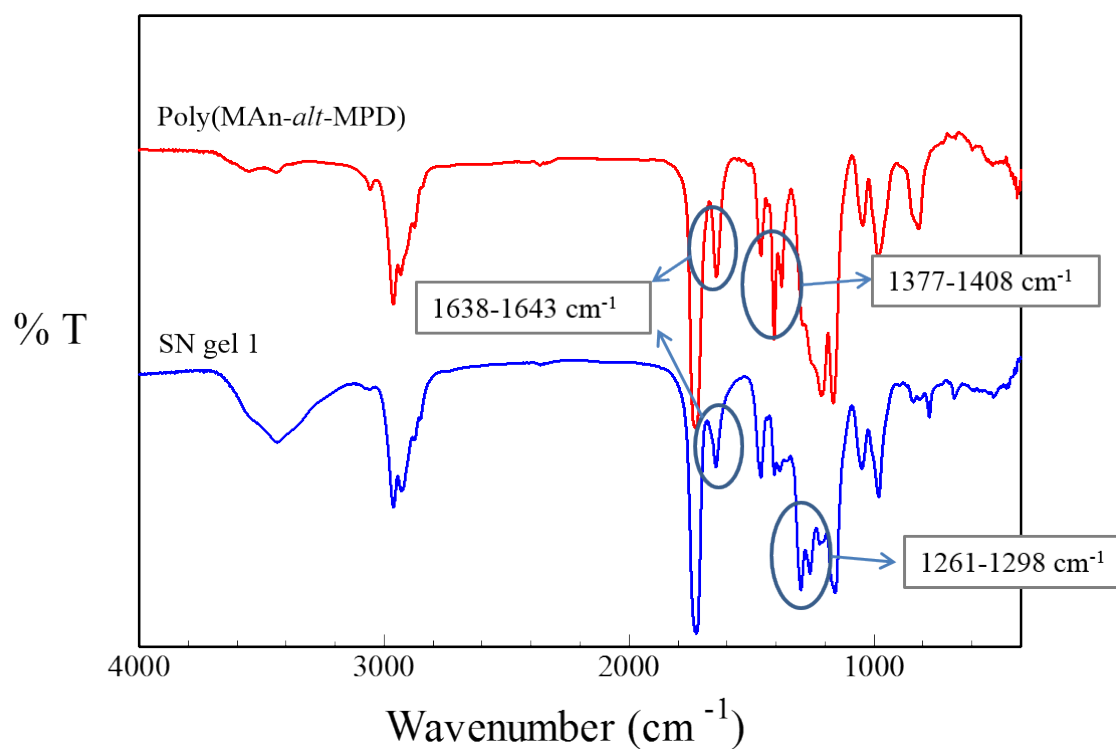

**Figure S15.** FT IR spectra of poly(MAn-*alt*-MPD) before (red) and after (blue) cross-linked by 1,2-ethanediamine. The peaks at 1377-1408  $\text{cm}^{-1}$  ascribed to *cis* double bonds and the peaks at 1261-1298  $\text{cm}^{-1}$  assigned to *trans* double bonds.
